# Supplementary material for: The Role of Runx2 in Microtubule Acetylation in Bone Metastatic Breast Cancer Cells
Source: MDPI journal article supplement (doi:10.3390/cancers14143436), 2022-07-15

# Supplemental Figure S1

## A

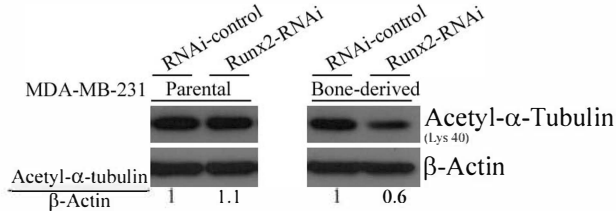

Supplemental Figure S2

A: HMN Cytoskeletal Array

Catalog #: PAHS-088Z

| Unigene   | Refseq       | Symbol   | Description                                                                             | Gname                                                                | RT2 Catalog |
|-----------|--------------|----------|-----------------------------------------------------------------------------------------|----------------------------------------------------------------------|-------------|
| Hs.643727 | NM_005722    | ACTR2    | ARP2 actin-related protein 2 homolog (yeast)                                            | ARP2                                                                 | PPH02650A   |
| Hs.433512 | NM_005721    | ACTR3    | ARP3 actin-related protein 3 homolog (yeast)                                            | ARP3                                                                 | PPH02648A   |
| Hs.503165 | NM_015242    | ARAP1    | ArhGAP with RhoGAP domain, ankyrin repeat and PH domain 1                               | CENTD2                                                               | PPH14047A   |
| Hs.75139  | NM_012402    | ARFIP2   | ADP-ribosylation factor interacting protein 2                                           | POR1                                                                 | PPH00936A   |
| Hs.435291 | NM_013423    | ARHGAP6  | Rho GTPase activating protein 6                                                         | RHOAGP6/RHOAGPX-1                                                    | PPH15096F   |
| Hs.504877 | NM_001175    | ARHGDIB  | Rho GDP dissociation inhibitor (GDI) beta                                               | D4-GDIA2/GDID4/LYGD/Ly-GDI/RAP1GN1/RhoGDI2                           | PPH00010F   |
| Hs.516954 | NM_198236    | ARHGEF11 | Rho guanine nucleotide exchange factor (GEF) 11                                         | GTRAP48/PDZ-RHOGEF                                                   | PPH18149A   |
| Hs.489284 | NM_005720    | ARPC1B   | Actin related protein 2/3 complex, subunit 1B, 41kDa                                    | ARC41/p40-ARC/p41-ARC                                                | PPH20196A   |
| Hs.529303 | NM_005731    | ARPC2    | Actin related protein 2/3 complex, subunit 2, 34kDa                                     | ARC34/PNAS-139/PRO2446/p34-Arc                                       | PPH10281B   |
| Hs.524741 | NM_001278556 | ARPC3    | Actin related protein 2/3 complex, subunit 3, 21kDa                                     | ARC21/p21-Arc                                                        | PPH20880A   |
| Hs.323342 | NM_005718    | ARPC4    | Actin related protein 2/3 complex, subunit 4, 20kDa                                     | ARC20/P20-ARC                                                        | PPH16919A   |
| Hs.518609 | NM_005717    | ARPC5    | Actin related protein 2/3 complex, subunit 5, 16kDa                                     | ARC16/dJ127C7.3/p16-Arc                                              | PPH11753A   |
| Hs.250822 | NM_003600    | AURKA    | Aurora kinase A                                                                         | AIK/ARK1/AURA/AURORA2/BTAK/PPP1R47/STK15/STK6/STK7                   | PPH15095A   |
| Hs.442658 | NM_004217    | AURKB    | Aurora kinase B                                                                         | AIK2/AIM-1/AIM1/ARK2/AurB/PL1/PPP1R48/STK12/STK5/aurkb-sv1/aurkb-sv2 | PPH21059F   |
| Hs.98338  | NM_003160    | AURKC    | Aurora kinase C                                                                         | AIK2/AIK3/ARK3/AurC/HEL-S-90/SPGF5/STK13/aurora-C                    | PPH10708A   |
| Hs.128316 | NM_006340    | BAIAP2   | BAI1-associated protein 2                                                               | BAP2/FLAF3/IRSP53                                                    | PPH11890A   |
| Hs.490203 | NM_004342    | CALD1    | Caldesmon 1                                                                             | CDM/H-CAD/HCAD/L-CAD/LCAD/NAG22                                      | PPH21139A   |
| Hs.282410 | NM_006888    | CALM1    | Calmodulin 1 (phosphorylase kinase, delta)                                              | CALML2/CAMI/CPVT4/DD132/LQT14/PHKD/caM                               | PPH14919C   |
| Hs.495984 | NM_003688    | CASK     | Calcium/calmodulin-dependent serine protein kinase (MAGUK family)                       | CAGH39/CAMGUK/CMG/FGS4/LIN2/MICPCH/MRXSNA/TNRC8                      | PPH16129A   |
| Hs.417050 | NM_003914    | CCNA1    | Cyclin A1                                                                               | CT146                                                                | PPH00971A   |
| Hs.194698 | NM_004701    | CCNB2    | Cyclin B2                                                                               | HsT17299                                                             | PPH00937F   |
| Hs.467637 | NM_001791    | CDC42    | Cell division cycle 42 (GTP binding protein, 25kDa)                                     | CDC42Hs/G25K                                                         | PPH00729F   |
| Hs.35433  | NM_003607    | CDC42BPA | CDC42 binding protein kinase alpha (DMPK-like)                                          | MRC/MRCKA/PK428                                                      | PPH10818B   |
| Hs.343380 | NM_006779    | CDC42EP2 | CDC42 effector protein (Rho GTPase binding) 2                                           | BORG1/CEP2                                                           | PPH07846A   |
| Hs.369574 | NM_006449    | CDC42EP3 | CDC42 effector protein (Rho GTPase binding) 3                                           | BORG2/CEP3/UB1                                                       | PPH17631B   |
| Hs.647078 | NM_004935    | CDK5     | Cyclin-dependent kinase 5                                                               | LIS7/PSSALRE                                                         | PPH02061E   |
| Hs.500015 | NM_003885    | CDK5R1   | Cyclin-dependent kinase 5, regulatory subunit 1 (p35)                                   | CDK5P35/CDK5R/NCK5A/p23/p25/p35/p35nck5a                             | PPH00951A   |
| Hs.170622 | NM_005507    | CFL1     | Cofilin 1 (non-muscle)                                                                  | CFL/HEL-S-15/cofilin                                                 | PPH13461F   |
| Hs.119594 | NM_007174    | CTT      | Citron (rho-interacting, serine/threonine kinase 21)                                    | CRIK/STK21                                                           | PPH23914A   |
| Hs.469840 | NM_015282    | CLASP1   | Cytoplasmic linker associated protein 1                                                 | MAST1                                                                | PPH20650A   |
| Hs.108614 | NM_015097    | CLASP2   | Cytoplasmic linker associated protein 2                                                 | .                                                                    | PPH58072B   |
| Hs.524809 | NM_002956    | CLIP1    | CAP-GLY domain containing linker protein 1                                              | CLIP/CLIP-170/CLIP170/CYLN1/RSN                                      | PPH01160A   |
| Hs.447018 | NM_003388    | CLIP2    | CAP-GLY domain containing linker protein 2                                              | CLIP/CLIP-115/CYLN2/WBSCR3/WBSCR4/WSCR3/WSCR4                        | PPH10952B   |
| Hs.461896 | NM_016823    | CRK      | V-ck sarcoma virus CT10 oncogene homolog (avian)                                        | CRKL/p38                                                             | PPH00731A   |
| Hs.596164 | NM_005231    | CTTN     | Cortactin                                                                               | EMS1                                                                 | PPH05698B   |
| Hs.26704  | NM_014608    | CYFIP1   | Cytoplasmic FMR1 interacting protein 1                                                  | P140SRA-1/SHYC/SRA-1/SRA1                                            | PPH08693A   |
| Hs.519702 | NM_014376    | CYFIP2   | Cytoplasmic FMR1 interacting protein 2                                                  | PR121                                                                | PPH14474F   |
| Hs.529451 | NM_005219    | DIAPH1   | Diaphanous homolog 1 (Drosophila)                                                       | DFNA1/DIA1/DRF1/LFHL1/hDLA1                                          | PPH20113B   |
| Hs.304192 | NM_006870    | DSTN     | Destrin (actin depolymerizing factor)                                                   | ACTDP/ADF/HEL32/bA462D18.2                                           | PPH19416A   |
| Hs.487027 | NM_003379    | EZR      | Ezrin                                                                                   | CVIL/CVIL/HEL-S-105/VIL2                                             | PPH00792B   |
| Hs.134060 | NM_017737    | FNBP1L   | Formin binding protein 1-like                                                           | Clor39/TOCA1                                                         | PPH14842A   |
| Hs.118555 | NM_012418    | FSCN2    | Fascin homolog 2, actin-bundling protein, retinal (Strongylocentrotus purpuratus)       | RFSN/RP30                                                            | PPH05554A   |
| Hs.522373 | NM_000177    | GSN      | Gelsolin                                                                                | ADF/AGEL                                                             | PPH02146C   |
| Hs.430551 | NM_003870    | IQQGAP1  | IQ motif containing GTPase activating protein 1                                         | HUMORFA01/SAR1/p195                                                  | PPH00734A   |
| Hs.291030 | NM_006633    | IQQGAP2  | IQ motif containing GTPase activating protein 2                                         | .                                                                    | PPH18229B   |
| Hs.647035 | NM_002314    | LIMK1    | LIM domain kinase 1                                                                     | LIMK/LIMK-1                                                          | PPH1081A    |
| Hs.474596 | NM_005569    | LIMK2    | LIM domain kinase 2                                                                     | .                                                                    | PPH15654A   |
| Hs.513983 | NM_004140    | LLGL1    | Lethal giant larvae homolog 1 (Drosophila)                                              | DLG4/HUGL/HUGL-1/HUGL1/LLGL                                          | PPH21268A   |
| Hs.472475 | NM_012090    | MACF1    | Microtubule-actin crosslinking factor 1                                                 | ABP620/ACF7/MACF/OF4                                                 | PPH18192A   |
| Hs.502872 | NM_002419    | MAP3K11  | Mitogen-activated protein kinase kinase kinase 11                                       | MEKK1/MLK-3/MLK3/PTK1/SPRK                                           | PPH00751B   |
| Hs.517949 | NM_002375    | MAP4     | Microtubule-associated protein 4                                                        | .                                                                    | PPH00381A   |
| Hs.178695 | NM_002754    | MAPK13   | Mitogen-activated protein kinase 13                                                     | MAPK_13/MAPK-13/PRKM13/SAPK4/p38delta                                | PPH01088C   |
| Hs.472437 | NM_012325    | MAPRE1   | Microtubule-associated protein, RP/EB family, member 1                                  | EB1                                                                  | PPH19426A   |
| Hs.532824 | NM_014268    | MAPRE2   | Microtubule-associated protein, RP/EB family, member 2                                  | EB1/EB2/RP1                                                          | PPH21359A   |
| Hs.101174 | NM_005910    | MAPT     | Microtubule-associated protein tau                                                      | DDPA/FTDP-17/MAPTL/MSTD/MTBT1/MTBT2/PPND/PPP1R103/TAU                | PPH05972F   |
| Hs.567261 | NM_004954    | MARK2    | MAP/microtubule affinity-regulating kinase 2                                            | EMK-1/EMK1/PAR-1/Par-1b/Par1b                                        | PPH13048A   |
| Hs.27695  | NM_000381    | MID1     | Midline 1 (Opitz/BBB syndrome)                                                          | BBBG1/FXY/GBBB1/MIDIN/OGS1/OS/OSX/RNF59/TRIM18/XPRF/ZNFXY            | PPH08761B   |
| Hs.713679 | NM_002444    | MSN      | Moesin                                                                                  | HEL70                                                                | PPH13452B   |
| Hs.477375 | NM_053025    | MYLK     | Myosin light chain kinase                                                               | AAT7/KRP/MLCK/MLCK1/MLCK108/MLCK210/MSTP083/MYLK1/smMLCK             | PPH18785B   |
| Hs.86092  | NM_033118    | MYLK2    | Myosin light chain kinase 2                                                             | KMLC/MLCK/MLCK2/sMLCK                                                | PPH10337A   |
| Hs.477693 | NM_006153    | NCK1     | NCK adaptor protein 1                                                                   | NCK/NCKalpha/nck-1                                                   | PPH00736A   |
| Hs.529244 | NM_003581    | NCK2     | NCK adaptor protein 2                                                                   | GRB4/NCKbeta                                                         | PPH01626B   |
| Hs.435714 | NM_002576    | PAK1     | P21 protein (Cdc42/Rac)-activated kinase 1                                              | PAKalpha                                                             | PPH01505F   |
| Hs.20447  | NM_005884    | PAK4     | P21 protein (Cdc42/Rac)-activated kinase 4                                              | .                                                                    | PPH08265A   |
| Hs.91747  | NM_002628    | PFN2     | Profilin 2                                                                              | D3S1319E/PFL                                                         | PPH10486B   |
| Hs.477114 | NM_145753    | PHLDB2   | Pleckstrin homology-like domain, family B, member 2                                     | LL5b/LL5beta                                                         | PPH07509A   |
| Hs.744997 | NM_015040    | PIKFYVE  | Phosphoinositide kinase, FYVE finger containing                                         | CFD/FAB1/HEL37/PIP5K/PIP5K3/ZFYVE29                                  | PPH13677B   |
| Hs.49582  | NM_002480    | PPP1R12A | Protein phosphatase 1, regulatory (inhibitor) subunit 12A                               | MI30/MBS/MYPT1                                                       | PPH18472C   |
| Hs.677346 | NM_002481    | PPP1R12B | Protein phosphatase 1, regulatory (inhibitor) subunit 12B                               | MYPT2/PP1bp55                                                        | PPH15402B   |
| Hs.435512 | NM_000944    | PPP3CA   | Protein phosphatase 3, catalytic subunit, alpha isozyme                                 | CALN/CALNA/CALNA1/CCN1/CNA1/PPP2B                                    | PPH01496A   |
| Hs.500067 | NM_021132    | PPP3CB   | Protein phosphatase 3, catalytic subunit, beta isozyme                                  | CALNA2/CALNB/CNA2/PP2Bbeta                                           | PPH01495B   |
| Hs.413812 | NM_006908    | RAC1     | Ras-related C3 botulinum toxin substrate 1 (rho family, small GTP binding protein Rac1) | MIG5/Rac-1/TC-25/p21-Rac1                                            | PPH00733F   |
| Hs.505469 | NM_013277    | RACGAP1  | Rac GTPase activating protein 1                                                         | CYK4/HsCYK-4/ID-GAP/MgcRacGAP                                        | PPH02149A   |
| Hs.263671 | NM_002906    | RDX      | Radixin                                                                                 | RDNB24                                                               | PPH02808A   |
| Hs.247077 | NM_001664    | RHOA     | Ras homolog gene family, member A                                                       | ARH12/ARHA/RHO12/RHOH12                                              | PPH03050G   |
| Hs.306307 | NM_005406    | ROCK1    | Rho-associated, coiled-coil containing protein kinase 1                                 | P160ROCK/ROCK-1                                                      | PPH01966C   |
| Hs.199763 | NM_018984    | SSH1     | Slingshot homolog 1 (Drosophila)                                                        | SSHIL                                                                | PPH09650B   |
| Hs.654754 | NM_033389    | SSH2     | Slingshot homolog 2 (Drosophila)                                                        | SSH-2/SSH-2L                                                         | PPH08582B   |
| Hs.209983 | NM_005563    | STMN1    | Stathmin 1                                                                              | Clorf215/LAP18/Lag/OP18/PP17/PP19/PR22/SMN                           | PPH14448B   |
| Hs.517228 | NM_003253    | TIAM1    | T-cell lymphoma invasion and metastasis 1                                               | .                                                                    | PPH05973F   |
| Hs.515469 | NM_003370    | VASP     | Vasodilator-stimulated phosphoprotein                                                   | .                                                                    | PPH19132B   |
| Hs.2157   | NM_000377    | WAS      | Wiskott-Aldrich syndrome (eczema-thrombocytopenia)                                      | IMD2/SCNX/THC/THC1/WASP/WASPA                                        | PPH07123A   |
| Hs.75850  | NM_003931    | WASF1    | WAS protein family, member 1                                                            | SCAR1/WAVE/WAVE1                                                     | PPH09998A   |
| Hs.143728 | NM_003941    | WASL     | Wiskott-Aldrich syndrome-like                                                           | N-WASP/NWASP/WASPB                                                   | PPH13819A   |
| Hs.520640 | NM_001101    | ACTB     | Actin, beta                                                                             | BRWS1/PS1TP5BP1                                                      | PPH00073G   |
| Hs.534255 | NM_004048    | B2M      | Beta-2-microglobulin                                                                    | .                                                                    | PPH01094E   |
| Hs.592355 | NM_002046    | GAPDH    | Glyceraldehyde-3-phosphate dehydrogenase                                                | G3PD/GAPD/HEL-S-162eP                                                | PPH00150F   |
| Hs.412707 | NM_000194    | HPRT1    | Hypoxanthine phosphoribosyltransferase 1                                                | HGPRT/HPRT                                                           | PPH01018C   |
| Hs.546285 | NM_001002    | RPLP0    | Ribosomal protein, large, P0                                                            | L10E/LP0/P0/PRLP0/RPP0                                               | PPH21138F   |
| N/A       | SA_00105     | HGDC     | Human Genomic DNA Contamination                                                         | HIGX1A                                                               |             |
| N/A       | SA_00104     | RTC      | Reverse Transcription Control                                                           | RTC                                                                  | PPX63340A   |
| N/A       | SA_00104     | RTC      | Reverse Transcription Control                                                           | RTC                                                                  | PPX63340A   |
| N/A       | SA_00104     | RTC      | Reverse Transcription Control                                                           | RTC                                                                  | PPX63340A   |
| N/A       | SA_00103     | PPC      | Positive PCR Control                                                                    | PPC                                                                  |             |
| N/A       | SA_00103     | PPC      | Positive PCR Control                                                                    | PPC                                                                  |             |
| N/A       | SA_00103     | PPC      | Positive PCR Control                                                                    | PPC                                                                  |             |

**B: HMN Autophagy Array**  
**Catalog #: PAHS-084Z**

| Unigene    | Refseq       | Symbol    | Description                                                                     | Gname                                                                                            | RT2 Catalog |
|------------|--------------|-----------|---------------------------------------------------------------------------------|--------------------------------------------------------------------------------------------------|-------------|
| Hs.525622  | NM_005163    | AKT1      | V-akt murine thymoma viral oncogene homolog 1                                   | AKT/CWS6/PKB/PKB-ALPHA/PRKBA/RAC/RAC-ALPHA                                                       | PPH00808B   |
| Hs.654644  | NM_017749    | AMBRA1    | Autophagy/bclcln-1 regulator 1                                                  | DCAF3/WDR94                                                                                      | PPH17960B   |
| Hs.434980  | NM_000484    | APP       | Amyloid beta (A4) precursor protein                                             | AAA/ABETA/ARBP/AD1/APPLCTFgamma/CVAP/PN-ILPN2                                                    | PPH00842A   |
| Hs.713698  | NM_014882    | ATG10     | ATG10 autophagy related 10 homolog (S. cerevisiae)                              | APG10/APG10L/pp12616                                                                             | PPH19514G   |
| Hs.264482  | NM_040707    | ATG12     | ATG12 autophagy related 12 homolog (S. cerevisiae)                              | APG12/APG12L/FBR93/HAPG12                                                                        | PPH15326A   |
| Hs.529322  | NM_019794    | ATG16L1   | ATG16 autophagy related 16-like 1 (S. cerevisiae)                               | APG16L/ATG16A/ATG16L1/BD10/WDR30                                                                 | PPH19850A   |
| Hs.653186  | NM_033388    | ATG16L2   | ATG16 autophagy related 16-like 2 (S. cerevisiae)                               | ATG16B/WDR80                                                                                     | PPH08292A   |
| Hs.477126  | NM_022488    | ATG3      | ATG3 autophagy related 3 homolog (S. cerevisiae)                                | APG3/APG3-LIKE/APG3L/PC3-96                                                                      | PPH08669A   |
| Hs.8763    | NM_052936    | ATG4A     | ATG4 autophagy related 4 homolog A (S. cerevisiae)                              | APG4A/AUTL2                                                                                      | PPH07642A   |
| Hs.283610  | NM_178326    | ATG4B     | ATG4 autophagy related 4 homolog B (S. cerevisiae)                              | APG4B/AUTL1                                                                                      | PPH15916A   |
| Hs.7353    | NM_178221    | ATG4C     | ATG4 autophagy related 4 homolog C (S. cerevisiae)                              | APG4-C/APG4C/AUTL1/AUTL3                                                                         | PPH07593A   |
| Hs.512799  | NM_052885    | ATG4D     | ATG4 autophagy related 4 homolog D (S. cerevisiae)                              | APG4-D/APG4D/AUTL4                                                                               | PPH02341A   |
| Hs.486063  | NM_004849    | ATG5      | ATG5 autophagy related 5 homolog (S. cerevisiae)                                | APG5/APG5-LIKE/APG5L/ASP/hAPG5                                                                   | PPH07722A   |
| Hs.740389  | NM_006395    | ATG7      | ATG7 autophagy related 7 homolog (S. cerevisiae)                                | APG7-LIKE/APG7L/GSA7                                                                             | PPH15687C   |
| Hs.323633  | NM_024085    | ATG9A     | ATG9 autophagy related 9 homolog A (S. cerevisiae)                              | APG9L1/MGD3208/mATG9                                                                             | PPH16921A   |
| Hs.707300  | NM_173681    | ATG9B     | ATG9 autophagy related 9 homolog B (S. cerevisiae)                              | APG9L2/NOS3AS/SONE                                                                               | PPH15659F   |
| Hs.370254  | NM_004322    | BAD       | BCL2-associated agonist of cell death                                           | BBC2/BCL2L8                                                                                      | PPH00075C   |
| Hs.485139  | NM_001188    | BAK1      | BCL2-antagonist/killer 1                                                        | BAK/BAK-LIKE/BCL2L7/CDN1                                                                         | PPH100077E  |
| Hs.624291  | NM_004324    | BAX       | BCL2-associated X protein                                                       | BCL2L4                                                                                           | PPH100078B  |
| Hs.150749  | NM_000633    | BCL2      | B-cell CLL/lymphoma 2                                                           | Bcl-2/PPP1R50                                                                                    | PPH100079B  |
| Hs.516966  | NM_138578    | BCL2L1    | BCL2-like 1                                                                     | BCL-XL/S/BCL2L1/BCLXL/BCLXS/Bcl-X/PPP1R52/bcl-2/bcl-2L/bcl-2S                                    | PPH00082C   |
| Hs.716464  | NM_005766    | BECN1     | Becclin 1, autophagy related                                                    | ATG6/VPS30/becclin                                                                               | PPH105670B  |
| Hs.517145  | NM_001196    | BID       | BH3 interacting domain death agonist                                            | FBN97                                                                                            | PPH00084C   |
| Hs.144873  | NM_004052    | BNIP2     | BCL2/adenovirus E1B 19kDa interacting protein 2                                 | BNIP2                                                                                            | PPH008301C  |
| Hs.141125  | NM_004346    | CASP3     | Caspase 3, apoptosis-related cysteine peptidase                                 | CPP32/PPP32B/SCA-1                                                                               | PPH00107C   |
| Hs.599762  | NM_001228    | CASP8     | Caspase 8, apoptosis-related cysteine peptidase                                 | ALPS2B/CAP4/Casp-8/FLICE/MACH/MCH5                                                               | PPH00359F   |
| Hs.238990  | NM_004064    | CDKN1B    | Cyclin-dependent kinase inhibitor 1B (p27, Kip1)                                | CDKN4/KIP1/MEN1B/MEN4/P27/KIP1                                                                   | PPH00212C   |
| Hs.512599  | NM_000077    | CDKN2A    | Cyclin-dependent kinase inhibitor 2A (melanoma, p16, inhibits CDK4)             | ARF/CDK4/CDKN2/CM2/INK4/INK4A/MLM/MTS-1/MTS1/P14/ARF/P16/P16-INK4A/P16INK4/P16INK4A/P19/ARF/TP16 | PPH00207C   |
| Hs.534667  | NM_000086    | CLN3      | Ceroid-lipofuscinosis, neuronal 3                                               | BTS/JNCL                                                                                         | PPH14111A   |
| Hs.520898  | NM_001908    | CTSB      | Cathepsin B                                                                     | APPS/CP5B                                                                                        | PPH10053F   |
| Hs.654447  | NM_001909    | CTSD      | Cathepsin D                                                                     | CLN10/CP5D/HEL-S-130P                                                                            | PPH00112F   |
| Hs.181301  | NM_004079    | CTSS      | Cathepsin S                                                                     |                                                                                                  | PPH006134A  |
| Hs.593413  | NM_003467    | CXCR4     | Chemokine (C-X-C motif) receptor 4                                              | CD184/2S201/E-FB22/HM89/HSY3RR/LAP-3/LAP3/LCR1/LESTR/NPY3R/NPYR/NPYRL/NPY3R/WHIM/WHIMS           | PPH00621A   |
| Hs.380277  | NM_004938    | DAPK1     | Death-associated protein kinase 1                                               | DAPK                                                                                             | PPH00073F   |
| Hs.525634  | NM_018370    | DRAM1     | DNA-damage regulated autophagy modulator 1                                      | DRAM                                                                                             | PPH19768F   |
| Hs.485606  | NM_178454    | DRAM2     | DNA-damage regulated autophagy modulator 2                                      | PRO180/TMEM77/WWFQ154                                                                            | PPH14917A   |
| Hs.591589  | NM_004836    | EIF2AK3   | Eukaryotic translation initiation factor 2-alpha kinase 3                       | PEK/PERK/WRS                                                                                     | PPH10874A   |
| Hs.433750  | NM_182917    | EIF4G1    | Eukaryotic translation initiation factor 4 gamma, 1                             | EIF-4G1/EIF4F/EIF4G/EIF4G/P220/PARK18                                                            | PPH102233A  |
| Hs.744830  | NM_000125    | ESR1      | Estrogen receptor 1                                                             | ER/ESR/ESRA/ESTRR/Era/NR3A1                                                                      | PPH10001A   |
| Hs.86131   | NM_003824    | FADD      | Fas (TNFRSF6)-associated via death domain                                       | GIG3/MORT1                                                                                       | PPH00367A   |
| Hs.667309  | NM_000043    | FAS       | Fas (TNF receptor superfamily, member 6)                                        | ALPS1A/APO-1/APT1/CD95/FAS1/FASTM/TNFRSF6                                                        | PPH100141B  |
| Hs.1437    | NM_000152    | GAA       | Glycosidase, alpha                                                              | LYAG                                                                                             | PPH07077E   |
| Hs.647421  | NM_007278    | GABARAP   | GABA(A) receptor-associated protein                                             | ATG8A/GABARAP/mMA66                                                                              | PPH00020B   |
| Hs.524250  | NM_011412    | GABARAPL1 | GABA(A) receptor-associated protein like 1                                      | APG8-LIKE/APG8L/ATG8/ATG8B/ATG8L_GEC1                                                            | PPH17234A   |
| Hs.461379  | NM_007285    | GABARAPL2 | GABA(A) receptor-associated protein-like 2                                      | ATG8/ATG8C/GATE-16/GATE16/GEF-2/GEF2                                                             | PPH07412A   |
| Hs.88556   | NM_004964    | HDAC1     | Histone deacetylase 1                                                           | GON-10/HD1/RPD3/RPD3L1                                                                           | PPH001735E  |
| Hs.6764    | NM_006044    | HDAC6     | Histone deacetylase 6                                                           | CPBHM/HD6/JM21/PPP1R90                                                                           | PPH01475B   |
| Hs.661056  | NM_004712    | HGS       | Hepatocyte growth factor-regulated tyrosine kinase substrate                    | HRS                                                                                              | PPH19788A   |
| Hs.525600  | NM_001017963 | HSP90AA1  | Heat shock protein 90kDa alpha (cytosolic), class A member 1                    | EL52/HSP86/HSP89A/HSP90A/HSP90N/HSPC1/HSPCA/HSPCAL1/HSPCAL4/HSPN/Hsp89/Hsp90/LAP-2/LAP2          | PPH16391B   |
| Hs.180414  | NM_006597    | HSPA8     | Heat shock 70kDa protein 8                                                      | HEL-33/HEL-S-72p/HSC54/HSC70/HSC71/HSP71/HSP73/HSPA10/LAP-1/LAP1/NIP71                           | PPH01211B   |
| Hs.518450  | NM_002111    | HTT       | Huntingtin                                                                      | HD/HT15                                                                                          | PPH07590F   |
| Hs.856     | NM_000619    | IFNG      | Interferon, gamma                                                               | IFG/IFI                                                                                          | PPH00380C   |
| Hs.140562  | NM_000618    | IGF1      | Insulin-like growth factor 1 (somatomedin C)                                    | IGF-1/IGF/MGF                                                                                    | PPH00167C   |
| Hs.7670035 | NM_000207    | INS       | Insulin                                                                         | IDDM1/DDM1/IDDM2/ILPR/IRDN/MODY10                                                                | PPH00651C   |
| Hs.519680  | NM_001145805 | IRGM      | Immunity-related GTPase family, M                                               | IFI1/IRGM1/LRG-47/LRG47                                                                          | PPH153303E  |
| Hs.494419  | NM_005561    | LAMP1     | Lysosomal-associated membrane protein 1                                         | CD107a/LAMPA/LGP120                                                                              | PPH05794G   |
| Hs.632273  | NM_181509    | MAP1LC3A  | Microtubule-associated protein 1 light chain 3 alpha                            | ATG8E/LC3/LC3A/MAP1LC3/MAP1BLC3                                                                  | PPH19436A   |
| Hs.356061  | NM_022818    | MAP1LC3B  | Microtubule-associated protein 1 light chain 3 beta                             | ATG8F/LC3B/MAP1A1/BLC3/MAP1LC3B-a                                                                | PPH17765B   |
| Hs.485233  | NM_001315    | MAPK14    | Mitogen-activated protein kinase 14                                             | CSBP/CSBP1/CSBP2/CSBP1/EXIP/Mg2/PRKM14/PRKM15/RK/SAPK2A/p38/p38AL/PHA                            | PPH00750B   |
| Hs.138211  | NM_002750    | MAPK8     | Mitogen-activated protein kinase 8                                              | JNK/JNK-46/JNK1/JNK1A2/JNK21B1/2/PRKM8/SAPK1/SAPK1c                                              | PPH00720B   |
| Hs.338207  | NM_004958    | MTOR      | Mechanistic target of rapamycin (serine/threonine kinase)                       | FRAP/FRAP1/FRAP2/RAFT1/RAFT1                                                                     | PPH02311D   |
| Hs.618430  | NM_005998    | NFKB1     | Nuclear factor of kappa light polypeptide gene enhancer in B-cells 1            | EBP-1/KBP1/NF-kB1/NF-kappa-B/NF-kappaB/NFKB-p105/NFKB-p50/NFkappaBp105/p50                       | PPH00204F   |
| Hs.464779  | NM_000271    | NPC1      | Niemann-Pick disease, type C1                                                   | NPC                                                                                              | PPH00435A   |
| Hs.656958  | NM_002647    | PIK3C3    | Phosphoinositide-3-kinase, class 3                                              | VPS34/Vps34h/Vps34                                                                               | PPH19820A   |
| Hs.32942   | NM_002649    | PIK3CG    | Phosphoinositide-3-kinase, catalytic, gamma polypeptide                         | PI3CG/PI3K/PI3Kgamma/PIK3p110gamma/p120-PI3K                                                     | PPH01226A   |
| Hs.149032  | NM_014602    | PIK3R4    | Phosphoinositide-3-kinase, regulatory subunit 4                                 | VPS15/p150                                                                                       | PPH16635A   |
| Hs.43322   | NM_006251    | PRKAA1    | Protein kinase, AMP-activated, alpha 1 catalytic subunit                        | AMPK/AMPKalpha                                                                                   | PPH00043B   |
| Hs.729457  | NM_000314    | PTEN      | Phosphatase and tensin homolog                                                  | I0q23del/BZS/CWS1/DEC/GLM2/MHAM/MMAC1/PTEN1/TEP1                                                 | PPH100327E  |
| Hs.16258   | NM_130781    | RAB24     | RAB24, member RAS oncogene family                                               | -                                                                                                | PPH100809B  |
| Hs.408528  | NM_000321    | RB1       | Retinoblastoma 1                                                                | OSRC/PPPIR130/RB/p105-Rb/Rb/p110                                                                 | PPH00228F   |
| Hs.422336  | NM_005873    | RGS19     | Regulator of G-protein signaling 19                                             | GAIP/RGSGAIP                                                                                     | PPH02525A   |
| Hs.463642  | NM_003161    | RPS6KB1   | Ribosomal protein S6 kinase, 70kDa, polypeptide 1                               | PS6K/S6K/S6K-beta-1/S6K1/STK14A/p70 S6KA/p70(S6K)-alpha/p70-S6K/p70-alpha                        | PPH00791F   |
| Hs.21374   | NM_000345    | SNCA      | Synuclein, alpha (non A4 component of amyloid precursor)                        | NACP/PARK1/PARK4/PD1                                                                             | PPH02849G   |
| Hs.587290  | NM_003900    | SQSTM1    | Sequestosome 1                                                                  | A170/ITDALS3/OSL1/PDB3/ZIP3-p60/p62/p62B                                                         | PPH01210A   |
| Hs.645227  | NM_000660    | TGFB1     | Transforming growth factor, beta 1                                              | CED/DPD1/LAP/TGFB/TGFBeta                                                                        | PPH00508A   |
| Hs.517033  | NM_004613    | TGCM2     | Transglutaminase 2 (C polypeptide, protein-glutamine-gamma-glutamyltransferase) | G-ALPHA-h/GNAH/HEL-S-45/TG2/TGC                                                                  | PPH123362A  |
| Hs.99439   | NM_153015    | TMEM74    | Transmembrane protein 74                                                        | NET36                                                                                            | PPH19786B   |
| Hs.241570  | NM_000594    | TNF       | Tumor necrosis factor                                                           | DIE/TNF-alpha/TNFA/TNFSF2                                                                        | PPH13378A   |
| Hs.478275  | NM_003810    | TNFSF10   | Tumor necrosis factor (ligand) superfamily, member 10                           | APO2L/Apo-2L/CD253/TL2/TRAIL                                                                     | PPH00242F   |
| Hs.437460  | NM_000546    | TP53      | Tumor protein p53                                                               | BCC7/LFS1/P53/TRP53                                                                              | PPH100213F  |
| Hs.47061   | NM_003565    | ULK1      | Unc-51-like kinase 1 (C. elegans)                                               | ATG1/ATG1A/UNC51/Unc51.1/hATG1                                                                   | PPH09320A   |
| Hs.168762  | NM_014683    | ULK2      | Unc-51-like kinase 2 (C. elegans)                                               | ATG1B/Unc51.2                                                                                    | PPH13378A   |
| Hs.202470  | NM_003369    | UVRAG     | UV radiation resistance associated gene                                         | DHTX/VPS38/p63                                                                                   | PPH07910B   |
| Hs.463964  | NM_017983    | WIP1      | WD repeat domain, phosphoinositide interacting 1                                | ATG18/ATG18A/WIP49                                                                               | PPH07685A   |
| Hs.520640  | NM_001101    | ACTB      | Actin, beta                                                                     | BRWS1/PS1/TPSBP1                                                                                 | PPH00073C   |
| Hs.534255  | NM_004048    | B2M       | Beta-2-microglobulin                                                            | -                                                                                                | PPH01094E   |
| Hs.592355  | NM_002046    | GAPDH     | Glyceraldehyde-3-phosphate dehydrogenase                                        | G3PD/GAPD/HEL-S-162aP                                                                            | PPH00150F   |
| Hs.412707  | NM_000194    | HPRT1     | Hypoxanthine phosphoribosyltransferase 1                                        | HGPRT/HPRT                                                                                       | PPH01018C   |
| Hs.546285  | NM_001002    | RPLP0     | Ribosomal protein, large, P0                                                    | L10E/LP0/P0/RPL0/RPP0                                                                            | PPH121138F  |
| N/A        | SA_00105     | HGDC      | Human Genomic DNA Contamination                                                 | HIGX1A                                                                                           |             |
| N/A        | SA_00104     | RTC       | Reverse Transcription Control                                                   | RTC                                                                                              | PPX63340A   |
| N/A        | SA_00104     | RTC       | Reverse Transcription Control                                                   | RTC                                                                                              | PPX63340A   |
| N/A        | SA_00104     | RTC       | Reverse Transcription Control                                                   | RTC                                                                                              | PPX63340A   |
| N/A        | SA_00103     | PPC       | Positive PCR Control                                                            | PPC                                                                                              |             |
| N/A        | SA_00103     | PPC       | Positive PCR Control                                                            | PPC                                                                                              |             |
| N/A        | SA_00103     | PPC       | Positive PCR Control                                                            | PPC                                                                                              |             |

# Supplemental Figure S3

**A**

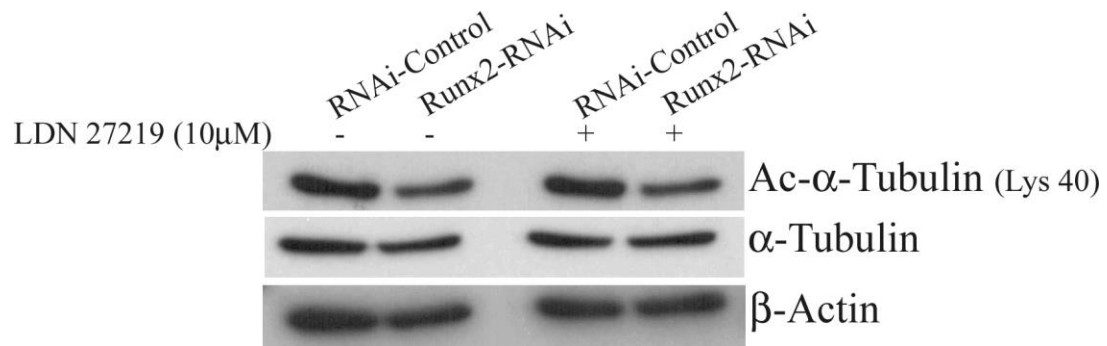

**B**

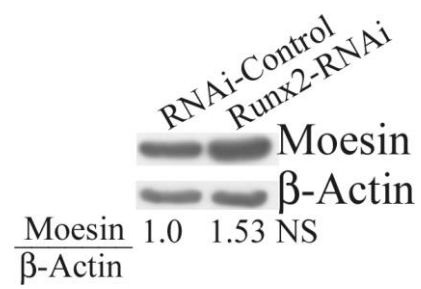

## Supplemental Figure S4: Original Western Blots

**Figure 3A**

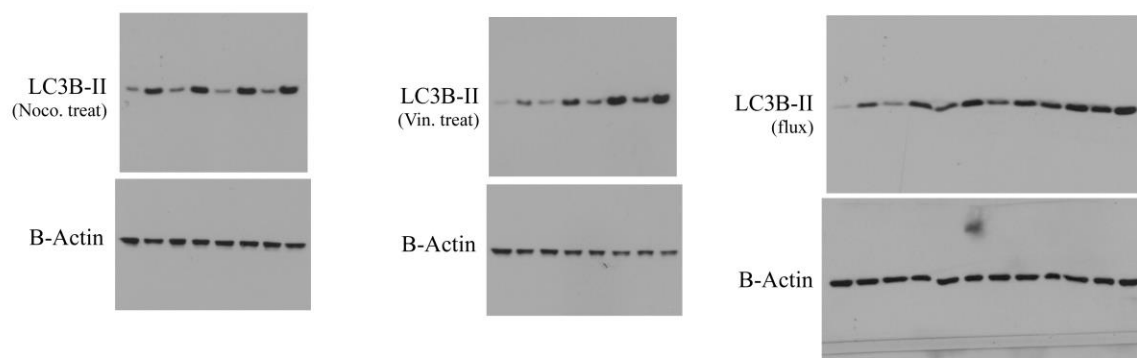

**Figure 3B**

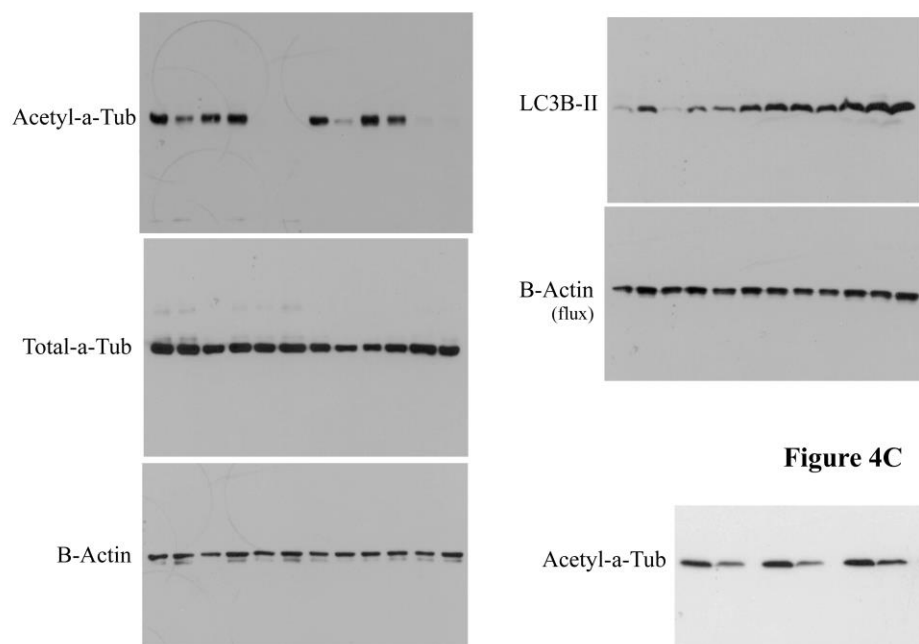

**Figure 3C**

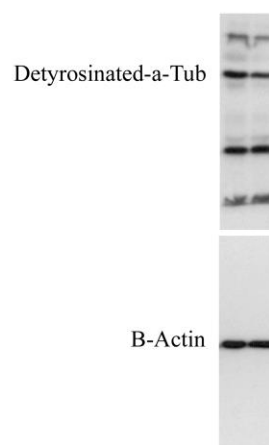

**Figure 4C**

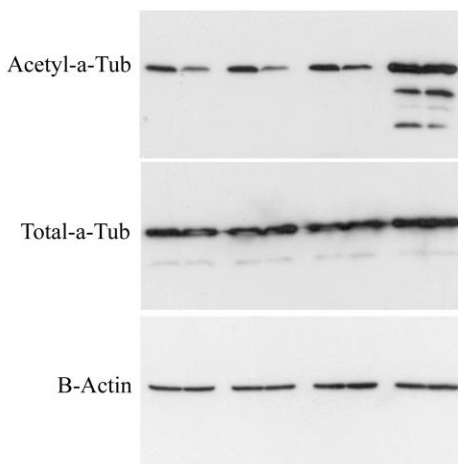

**Figure 4B**

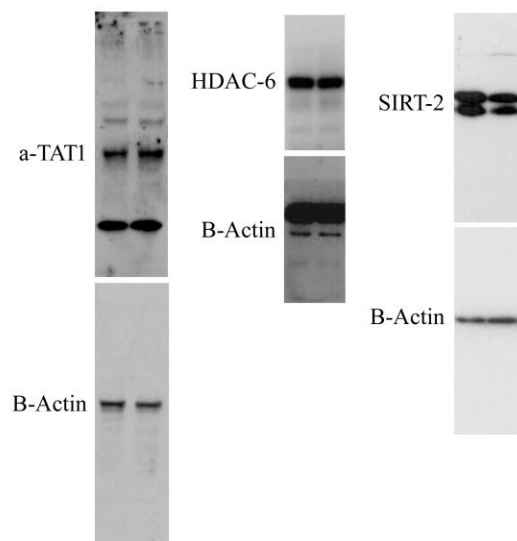

**Figure 5C**

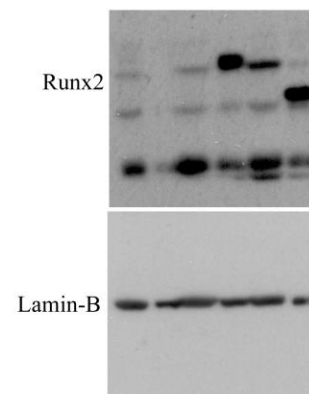

**Figure 6A**

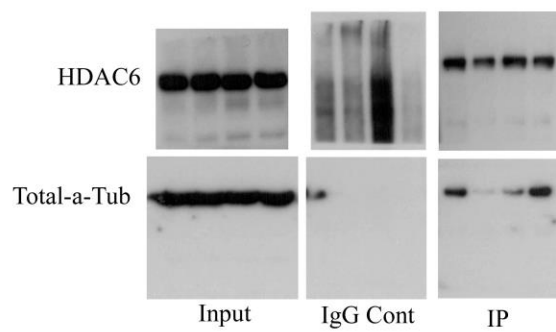

**Figure 6B**

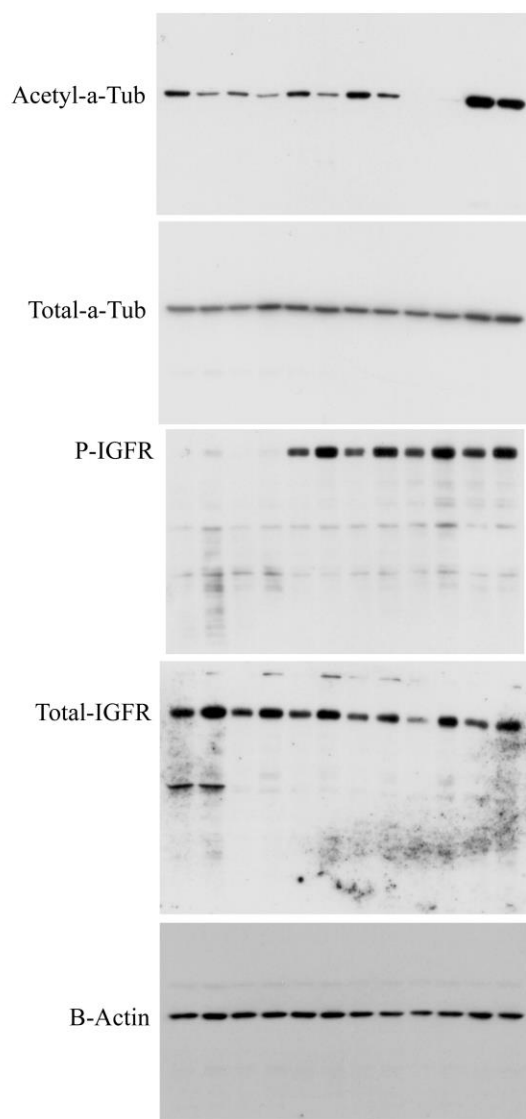

**Figure 6C**

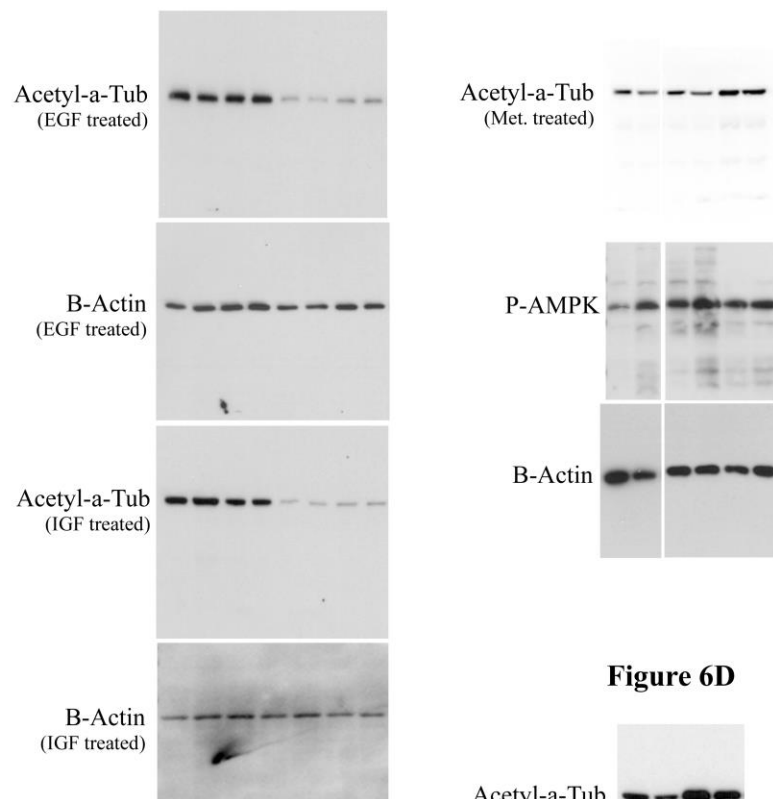

**Figure 6D**

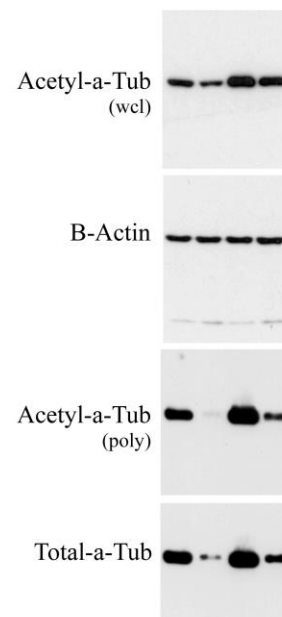

Supplement: s1 [file s1]
